# Supplementary material
Source: ML conference proceedings conference paper supplement (https://proceedings.mlr.press/v54/malek17a.html)
Supplement: Supplementary file [file malek17a-supp.pdf]

## A Proofs

*Proof of Lemma 4.1.* Let  $T_b$  be the smallest  $t$  at which the positive martingale  $\Lambda_t \geq b$ , with  $T_b = \infty$  if the threshold is never crossed. Then  $T_b$  is a stopping time. For some number of visitors  $t$ , we have

$$\Lambda_{\min\{T_b, t\}} \geq \begin{cases} b & T_b \leq t, \\ 0 & T_b > t. \end{cases}$$

Therefore, we may write

$$1 = \mathbb{E}[\Lambda_{\min\{T_b, t\}}] \geq bP(T_b \leq t),$$

where the equality comes from the *optional stopping theorem*. Taking  $t \rightarrow \infty$  bounds the probability of ever crossing the threshold at  $P(T_b \leq \infty) \leq 1/b$ , which means  $P(\exists t \text{ such that } \Lambda_t \geq b) \leq 1/b$ . This completes the proof of this lemma.  $\square$

*Proof of Corollary 4.2.* Based on fundamental arguments in probability theory, we have the following chain of inequalities:

$$\begin{aligned} \mathbb{P}\left(\frac{1}{\max_{n' \leq t} \Lambda_{n'}} \leq \delta\right) &= \mathbb{P}\left(\max_{n' \leq t} \Lambda_{n'} \geq 1/\delta\right) \\ &\leq \mathbb{P}(\exists t \text{ such that } \Lambda_t \geq 1/\delta) \\ &\leq \delta \end{aligned}$$

where the last step follows from Lemma 4.1. This completes the proof of this corollary.  $\square$

*Proof of Corollary 4.3.* We first show that the likelihood ratio is a positive martingale under the simple null hypothesis  $H_0 : \theta_0$ . If we take the expectation under the null hypothesis  $H_0$  from the likelihood ratio  $\Lambda_t$ , i.e.,

$$\Lambda_t = \frac{\Pr(\mathcal{D}_t | \theta_1^*)}{\Pr(\mathcal{D}_t | \theta_0^*)} \stackrel{\text{i.i.d.}}{=} \prod_{t=1}^n \frac{P(x_t | \theta_1^*)}{P(x_t | \theta_0^*)}$$

conditioned on whatever observed up to time  $t-1$ , i.e.,  $\mathcal{F}_{t-1}$ , we have

$$\begin{aligned} \mathbb{E}_0[\Lambda_t | \mathcal{F}_{t-1}] &= \mathbb{E}_0 \left[ \frac{P(x_t | \theta_1^*)}{P(x_t | \theta_0^*)} \right] \prod_{t=1}^{t-1} \frac{P(x_t | \theta_1^*)}{P(x_t | \theta_0^*)} \\ &= \Lambda_{t-1} \underbrace{\int \frac{P(x_t | \theta_1^*)}{P(x_t | \theta_0^*)} P(x_t | \theta_0^*) dx_t}_{=1} \\ &= \Lambda_{t-1} \end{aligned}$$

where  $\mathbb{E}_0$  is the expectation under the null hypothesis  $H_0$ .

We then show that the Bayes factor is also a test martingale if the null hypothesis is simple.

To start with, since the null hypothesis is simple,  $\int P(\theta_0 | M_0) P(\mathcal{D}_n | \theta_0, M_0) d\theta_0 = P(\mathcal{D}_n | M_0, \theta_0)$ . Hence we may write the Bayes factor as

$$\begin{aligned} \Lambda_n &= \frac{\int \Pr(\theta_1 | M_1) \Pr(\mathcal{D}_n | \theta_1, M_1) d\theta_1}{\int \Pr(\theta_0 | M_0) \Pr(\mathcal{D}_n | \theta_0, M_0) d\theta_0} \\ &= \frac{\int P(\theta_1 | M_1) \prod_{t=1}^n P(x_t | \theta_1, M_1) d\theta_1}{\prod_{t=1}^n P(x_t | \theta_0, M_0)} \end{aligned}$$

The expectation under the null hypothesis  $H_0$  from  $\Lambda_n$  conditioned on whatever observed up to time  $n-1$ , i.e.,  $\mathcal{F}_{n-1}$ , we have

$$\begin{aligned} \mathbb{E}_0[\Lambda_n | \mathcal{F}_{n-1}] &= \mathbb{E}_0 \left[ \int \frac{P(\theta_1 | M_1) P(x_n | \theta_1, M_1) \prod_{t=1}^{n-1} P(x_t | \theta_1, M_1) d\theta_1}{P(x_n | M_0) \prod_{t=1}^{n-1} P(x_t | M_0)} \right] \\ &= \int P(\theta_1 | M_1) \underbrace{\mathbb{E}_0 \left[ \frac{P(x_n | \theta_1, M_1)}{P(x_n | M_0)} \right]}_{=1} \frac{\prod_{t=1}^{n-1} P(x_t | \theta_1, M_1)}{\prod_{t=1}^{n-1} P(x_t | M_0)} d\theta_1 \\ &= \int P(\theta_1 | M_1) \frac{\prod_{t=1}^{n-1} P(x_t | \theta_1, M_1)}{\prod_{t=1}^{n-1} P(x_t | M_0)} d\theta_1 \\ &= \frac{\int P(\theta_1 | M_1) P(\mathcal{D}_{n-1} | \theta_1, M_1) d\theta_1}{P(\mathcal{D}_{n-1} | M_0)} = \Lambda_{n-1} \end{aligned}$$

$\square$

*Proof of Lemma 5.5.* Recall that  $m_0$  is the number of true null hypotheses which we assume have indices  $1, \dots, m_0$ ; thus,  $p_T^1, \dots, p_T^{m_0}$  are all sequential  $p$ -values. This implies that there must exist an increasing function  $g^k$  with  $g^k(x) \leq x$  such that  $\Pr(g^k(p_T^k) \leq \delta) = \delta$ ; thus,  $g^k(p_T^k) \sim \text{Uniform}[0, 1]$ . If  $p_T^k$  is discrete, then we may need to allow  $g$  to be random, e.g.  $g^k(p_T^k) + \xi$ , where  $\xi$  is chosen to interpolate between subsequent values of  $p_T^k$ .

Define  $V = |\mathcal{P}(g^1(p_T^1), \dots, g^m(p_T^m)) \cap \{1, \dots, m_0\}|$  as the number of true hypotheses rejected by  $\mathcal{P}$  on the modified  $p$ -values. We will argue that  $V_T \leq V$  almost surely.

First, suppose that  $\mathcal{P}$  is a step-up procedure and  $V = i$ ; this implies that  $g^{(k)}(p^{(k)}) \leq \alpha_i$  for all  $k \leq i$  and  $\alpha_i < g^{(k)}(p^{(k)})$  for all  $k > i$ . Since  $g(p) \leq p$ , we must have

$$\alpha_i < g^{(k)}(p^{(k)}) \leq p^{(k)} \quad \forall k < i$$

and hence  $V_t \leq V$  a.s.. This implies that  $\mathbb{E}[f(V_T, s)] \leq \mathbb{E}[f(V, s)]$ , and using the the guarantee of  $\mathcal{P}$  on  $f(V, s)$  implies  $\mathbb{E}[f(V_T, s)] \leq \mathbb{E}[f(V, s)] \leq q$  for all  $s$ , which yields the theorem statement by linearity of expectation.

If  $\mathcal{P}$  only have an independent guarantee, note that if  $p_T^1, \dots, p_T^{m_0}$  are independent, then so are

$g^1(p_T^1), \dots, g^{m_0}(p_T^{m_0})$  and we can apply the same reasoning as above to imply the  $(f, q)$  guarantee in the independent case.  $\square$

*Proof of Lemma 5.6.* Let  $\mathcal{M} = \mathcal{R}(p_{T_1}^1, \dots, p_{T_m}^m)$ ,  $\mathcal{M}' = \mathcal{R}(p_N^1, \dots, p_N^m)$  be the tests rejected by  $\mathcal{S}(\mathcal{P})$  and  $\mathcal{S}'(\mathcal{P})$  and  $R = |\mathcal{M}|$ ,  $R' = |\mathcal{M}'|$  be their cardinality, respectively.

Consider the case when  $\mathcal{P}$  is a step-up procedure. We show that  $R = R'$ . The monotonicity of the sequential  $p$ -values implies that  $p_{T_k}^k \leq p_N^k$  for all  $k$ , and thus  $R \leq R'$ ; if  $p_{T_k}^k$  is rejected, then  $p_N^k$  must be as well. We also argue that  $R \geq R'$ ; suppose, instead, that  $R < R'$ , which implies that  $p_{T_{(R)}}^{(R)} \leq \alpha_R < p_N^{(R')} \leq \alpha_{R'}$ , which is a contradiction since  $T_k = N$  for all  $k$  that were not already stopped. Hence,  $R = R'$ .

If the two procedures both reject  $R$  tests, then  $\alpha_R < p_N^{(V+1)}, \dots, p_N^{(m)}$  and  $\alpha_R < p_{T_{(R+1)}}^{(R+1)}, \dots, p_{T_{(m)}}^{(m)}$  correspond to the tests that have not been rejected. But we have  $T_{(R+1)}, \dots, T_{(m)} = N$ , so  $\mathcal{M} = \mathcal{M}'$ .

Now consider the case when  $\mathcal{P}$  is a step-down procedure. If  $R$  tests are rejected by  $\mathcal{S}(\mathcal{P})$ , then  $p_{T_{(1)}}^{(1)} \leq \alpha_1, \dots, p_{T_{(R)}}^{(R)} \leq \alpha_R$ . Since  $p_N^{(k)} \leq p_{T_{(k)}}^{(k)}$ , we must have  $\mathcal{M} \subseteq \mathcal{M}'$ . Now, suppose there exists an index  $k$  such that test  $k$  is rejected by  $\mathcal{S}'(\mathcal{P})$  but not  $\mathcal{S}(\mathcal{P})$ . This implies that  $p_N^k \leq \alpha_{R'}$  but  $p_{T_k}^k > \alpha_{R'}$ . However, by construction of  $T_k$ , we have that  $T_k < N$  only if test  $k$  is rejected, which implies that  $p_{T_k}^k > \alpha_{R'}$  cannot happen. Thus, we have  $\mathcal{M} = \mathcal{M}'$  for the step-down case as well.  $\square$
